# Supplementary material for: Genomic Characteristics and Selection Signatures in Indigenous Chongming White Goat (Capra hircus)
Source: Front Genet. 2020 Aug 21;11:901. doi: 10.3389/fgene.2020.00901 (PMC7472782; doi:10.3389/fgene.2020.00901)
Supplement: DATA S1 — Phenotype description of 10 goat breeds. [file Table_1.XLSX]

## Sheet: Sheet1
Phenotype description of 10 goat breeds
Breeds	Buck / Doe	Weight (kg)	Height (cm)	Chest size (cm)	Body length (cm)	Coat color	Ear size	Farrow rate (%)
CM	Buck	23-32	53-60	70-80	67-77	White	Medium	180-320%
	Doe	18-25	47-52	59-68	56-64
HM	Buck	30-40	55-59	60-65	65-70	White	Medium	200-250%
	Doe	21-23	50-55	56-60	55-65
XH	Buck	32-42	70-82	80-93	71-84	White	Medium	~250%
	Doe	25-28	52-60	65-75	56-69
YC	Buck	26-45	51-59	70-83	59-70	White	Medium	150-200%
	Doe	21-33	50-55	64-75	55-63
MT	Buck	40-50	55-65	70-85	65-70	White	Medium	150-200%
	Doe	35-40	52-58	70-80	60-65
QS	Buck	24-30	55-60	65-75	60-70	Blue-grey	Medium	~300%
	Doe	20-26	45-55	60-70	60-65
MB	Buck	60-70	65-70	75-90	70-75	Black	Medium	~220%
	Doe	40-50	60-65	75-85	65-70
DE	Buck	60-70	70-80	85-100	80-90	Brown	Large	~230%
	Doe	45-50	60-70	75-85	70-78
NJ	Buck	40-55	65-80	80-95	70-85	Brown	Medium	~200%
	Doe	34-46	60-70	75-85	65-75
Bor	Buck	90-130	75-90	84-96	85-95	White body & brown head	Large	160-220%
	Doe	80-100	65-75	75-84	70-80
